# Supplementary material for: Multicomponent Fe-based composites derived from the oxidation and reduction of Prussian blue towards efficient electromagnetic wave absorption
Source: Royal Society of Chemistry journal article supplement (doi:10.1039/d1tc00455g), 2021-01-01
Supplement: d1tc00455g1.pdf [file d1tc00455g1.pdf]

## Supporting Information

# Multicomponent Fe-based composites derived from oxidation and reduction of Prussian blue towards efficient electromagnetic wave absorption

Wei Liu,<sup>ab</sup> Pengtao Duan,<sup>ab</sup> Hanwu Xiong,<sup>c</sup> Hailin Su,<sup>\*ab</sup> Xuebin Zhang,<sup>\*ab</sup> Jinzhi Wang,<sup>\*d</sup> Fuyao Yang<sup>e</sup> and Zhongqiu Zou<sup>ab</sup>

a School of Materials Science and Engineering and Anhui Provincial Key Laboratory of Advanced Functional Materials and Devices, Hefei University of Technology, Hefei, 230009, China

b Anhui Red Magneto-electric Technology Co., Ltd., Wuhu, 241002, China

c State Grid Corporation of China, Beijing, 100031, China

d School of Materials and Chemistry Engineering, Ningbo University of Technology, Ningbo, 315211, China

e State Key Laboratory of Advanced Power Transmission Technology, Global Energy Interconnection Research Institute Co., Ltd., Beijing, 102211, China

### Corresponding Author

Email: hailinsu@hfut.edu.cn; zzhxhxbb@126.com; wangjz@nbut.edu.cn

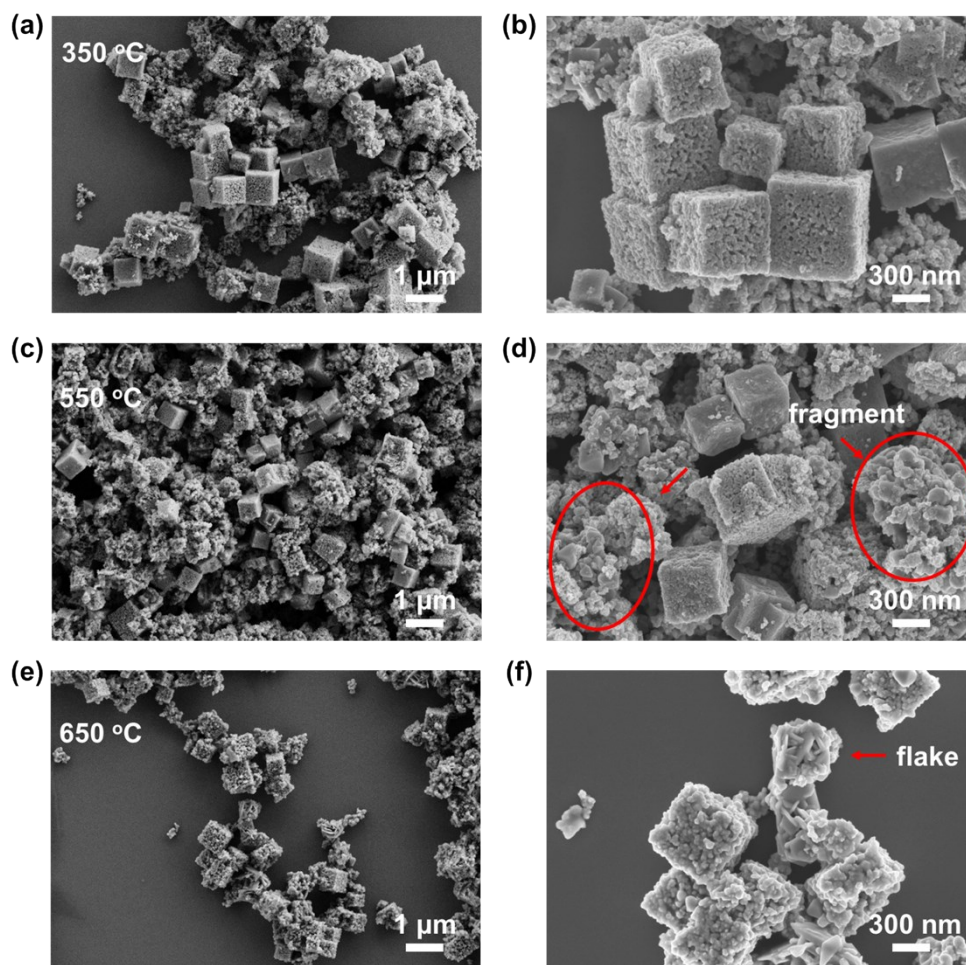

**Fig. S1** SEM images of Fe<sub>2</sub>O<sub>3</sub> derived from Prussian blue at (a,b) 350 °C, (c,d) 550 °C and (e,f) 650 °C.

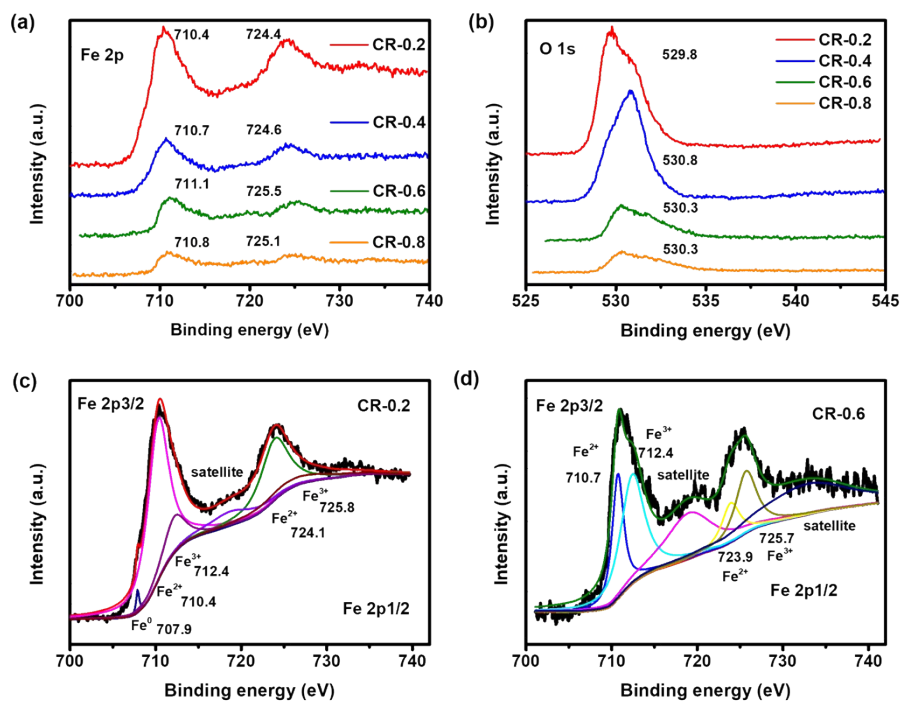

**Fig. S2** (a) Fe 2p and (b) O 1s XPS spectra of reduced products. High resolution Fe 2p XPS spectra of (c) CR-0.2 and (d) CR-0.6.

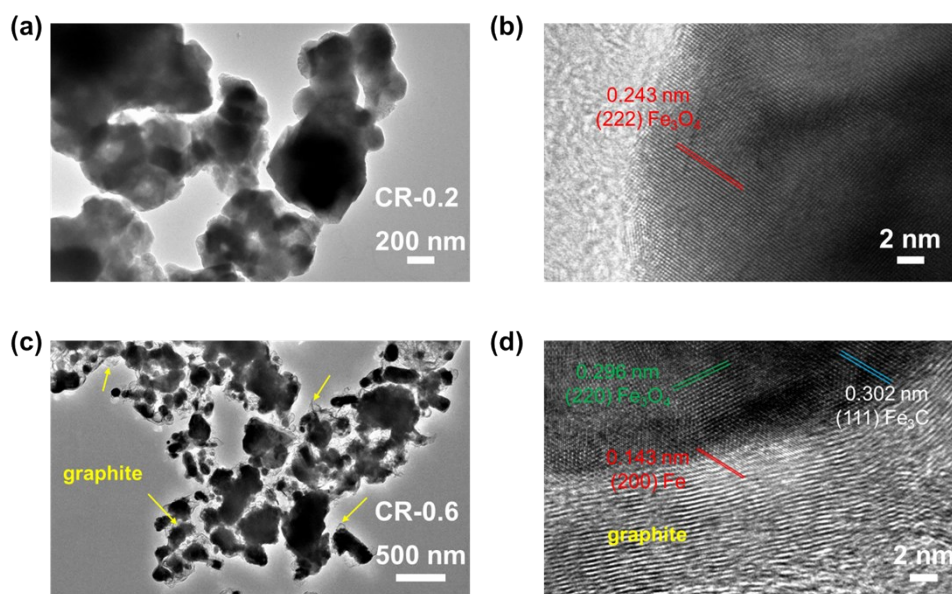

**Fig. S3** (a) TEM image and (b) HRTEM image of CR-0.2. (c) TEM image and (d) HRTEM image of CR-0.6.

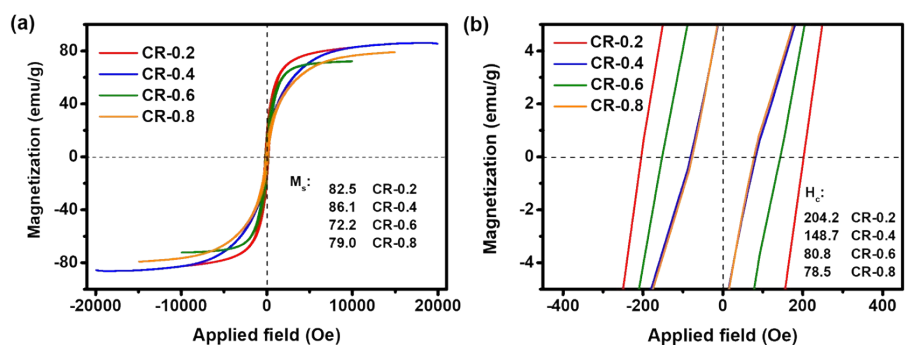

**Fig. S4** (a) Magnetic hysteresis loops and (b) enlarged hysteresis loops of reduced products.

**Table S1** Comparison of microwave absorption performance of similar microwave absorbing materials

| samples                                                   | filling<br>ratio<br>(wt%) | thickness<br>(mm) | RL (dB) | EAB<br>(GHz) | Ref. |
|-----------------------------------------------------------|---------------------------|-------------------|---------|--------------|------|
| FeCo@C@CNGs                                               | 50                        | 2                 | -67.8   | 5.3          | 1    |
| Fe <sub>3</sub> Si/SiC@SiO <sub>2</sub>                   | 30                        | 2.4               | ~-18    | 5.4          | 2    |
| Fe/Fe <sub>3</sub> O <sub>4</sub> @TCNFs@TiO <sub>2</sub> | 15                        | 1.6               | -44.8   | 3.7          | 3    |
| CN-Fe <sub>3</sub> C                                      | 10                        | 2                 | -46.78  | 5.01         | 4    |
| Fe <sub>3</sub> O <sub>4</sub> @C                         | 60                        | 2                 | -28.9   | 5.5          | 5    |
| ZnNiC                                                     | 50                        | 1.6               | -66.1   | 4.4          | 6    |
| Fe <sub>3</sub> O <sub>4</sub> @NPC@rGO                   | 25                        | 2                 | -72.6   | 5.5          | 7    |
| Co/N/C@MnO <sub>2</sub>                                   | 15                        | 3.7               | -58.9   | 5.5          | 8    |

|                              |           |            |               |             |                  |
|------------------------------|-----------|------------|---------------|-------------|------------------|
| CoNi@NC@rGO                  | 25        | 2.5        | -             | 6.7         | 9                |
| Fe-NiS <sub>2</sub> /NiS     | 20        | 1.7        | ~-18          | 3.8         | 10               |
| (SiC/Fe)@C                   | 25        | 1.95       | -63.44        | 7           | 11               |
| Mo <sub>2</sub> N@CoFe@C/CNT | 20        | 2          | -53.5         | 5           | 12               |
| <b>CR-0.6</b>                | <b>40</b> | <b>1.5</b> | <b>-15.27</b> | <b>5.44</b> | <b>this work</b> |

---

## References

- 1 F. Wang, N. Wang, X. Han, D. Liu, Y. Wang, L. Cui, P. Xu and Y. Du, *Carbon*, 2019, **145**, 701-711.
- 2 M. Zhang, Z. Li, T. Wang, S. Ding, G. Song, J. Zhao, A. Meng, H. Yu and Q. Li, *Chem. Eng. J.*, 2019, **362**, 619-627.
- 3 J. Wang, Y. Cui, F. Wu, T. Shah, M. Ahmad, A. Zhang, Q. Zhang and B. Zhang, *Carbon*, 2020, **165**, 275-285.
- 4 S. Gao, S. H. Yang, H. Y. Wang, G. S. Wang and P. G. Yin, *Carbon*, 2020, **162**, 438-444.
- 5 S. Gao, Y. Zhang, H. Xing and H. Li, *Chem. Eng. J.*, 2020, **387**, 124149.
- 6 P. Miao, J. Cao, J. Kong, J. Li, T. Wang and K. J. Chen, *Nanoscale*, 2020, **12**, 13311-13315.
- 7 Z. Xiang, J. Xiong, B. Deng, E. Cui, L. Yu, Q. Zeng, K. Pei, R. Che and W. Lu, *J. Mater. Chem. C*, 2020, **8**, 2123-2134.
- 8 R. Wang, M. He, Y. Zhou, S. Nie, Y. Wang, W. Liu, Q. He, W. Wu, X. Bu and X.

Yang, *Carbon*, 2020, **156**, 378-388.

9 X. Xu, F. Ran, Z. Fan, Z. Cheng, T. Lv, L. Shao and Y. Liu, *ACS Appl. Mater. Interfaces*, 2020, **12**, 17870-17880.

10 N. Gao, W. P. Li, W. S. Wang, D. P. Liu, Y. M. Cui, L. Guo and G. S. Wang, *ACS Appl. Mater. Interfaces*, 2020, **12**, 14416-14424.

11 M. Javid, X. Qu, F. Huang, X. Li, A. Farid, A. Shah, Y. Duan, Z. Zhang, X. Dong and L. Pan, *Carbon*, 2021, **171**, 785-797.

12 C. Xu, L. Wang, X. Li, X. Qian, Z. Wu, W. You, K. Pei, G. Qin, Q. Zeng, Z. Yang, C. Jin and R. Che, *Nano-Micro Lett.*, 2021, **13**, 47.
